# Supplementary material
Source: Research Square preprint supplement (doi:10.21203/rs.3.rs-10284209/v1)

Appendices

**Appendix A:** *Assessment Rubrics for Teaching and Learning Visual Aids/Resources adapted from Ghana Education Service and NaCCA assessment rubrics.*

**a. Visual Resource Quality Rubric**

| **Criteria** | **Excellent (5)** | **Very Good (4)** | **Good (3)** | **Fair (2)** | **Poor (1)** |
| --- | --- | --- | --- | --- | --- |
| **Clarity & Accuracy** | Resource is clear, accurate, and error-free. | Mostly clear and accurate with very few errors. | Generally clear with minor errors. | Some clarity issues or inaccuracies. | Confusing or inaccurate. |
| **Cultural Responsiveness** | Strongly reflects Ghanaian culture, values, and language diversity. | Reflects Ghanaian culture with few missing elements. | Some cultural elements included. | Limited cultural references. | No cultural relevance. |
| **Pedagogical Alignment** | Directly supports lesson objectives and learner needs. | Mostly supports lesson objectives. | Generally aligned with objectives. | Weak alignment with lesson goals. | No clear link to learning. |
| **Creativity & Engagement** | Highly engaging and visually appealing. | Engaging with thoughtful design. | Moderately engaging. | Somewhat engaging. | Not engaging. |

**b. Lesson Delivery Effectiveness Rubric**

| **Dimension** | **Excellent (5)** | **Very Good (4)** | **Good (3)** | **Fair (2)** | **Poor (1)** |
| --- | --- | --- | --- | --- | --- |
| **Integration of AI Visuals** | Smooth integration into lesson. | Well integrated with minor lapses. | Mostly integrated. | Minimal integration. | Not integrated. |
| **Clarity of Instruction** | Very clear and easy to understand. | Clear with slight gaps. | Generally clear. | Somewhat unclear. | Confusing. |
| **Learner Engagement** | Actively involves students throughout. | Frequent student involvement. | Moderate involvement | Limited involvement. | No involvement. |
| **Confidence of Teacher** | Highly confident using AI visuals. | Confident with few hesitations. | Generally confident. | Hesitant at times. | Lacks confidence. |


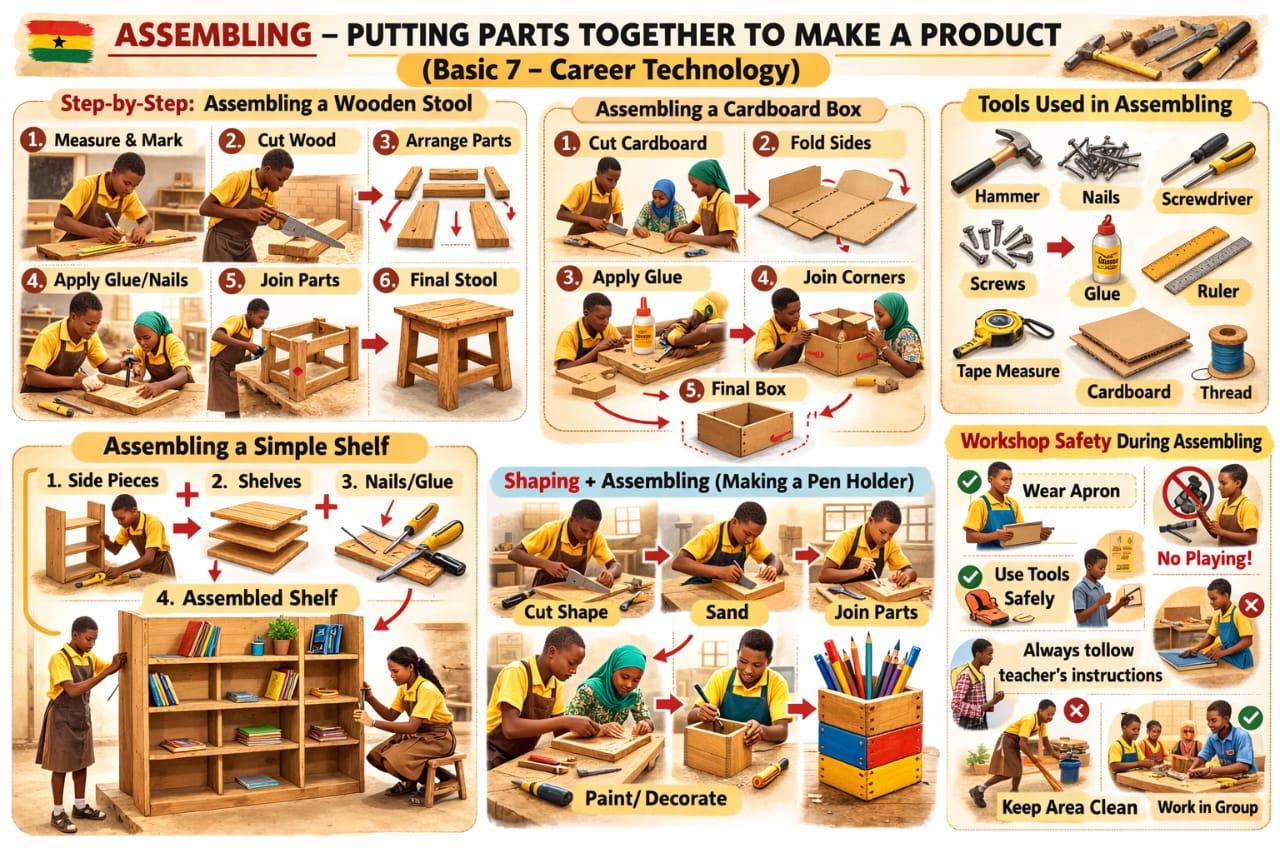


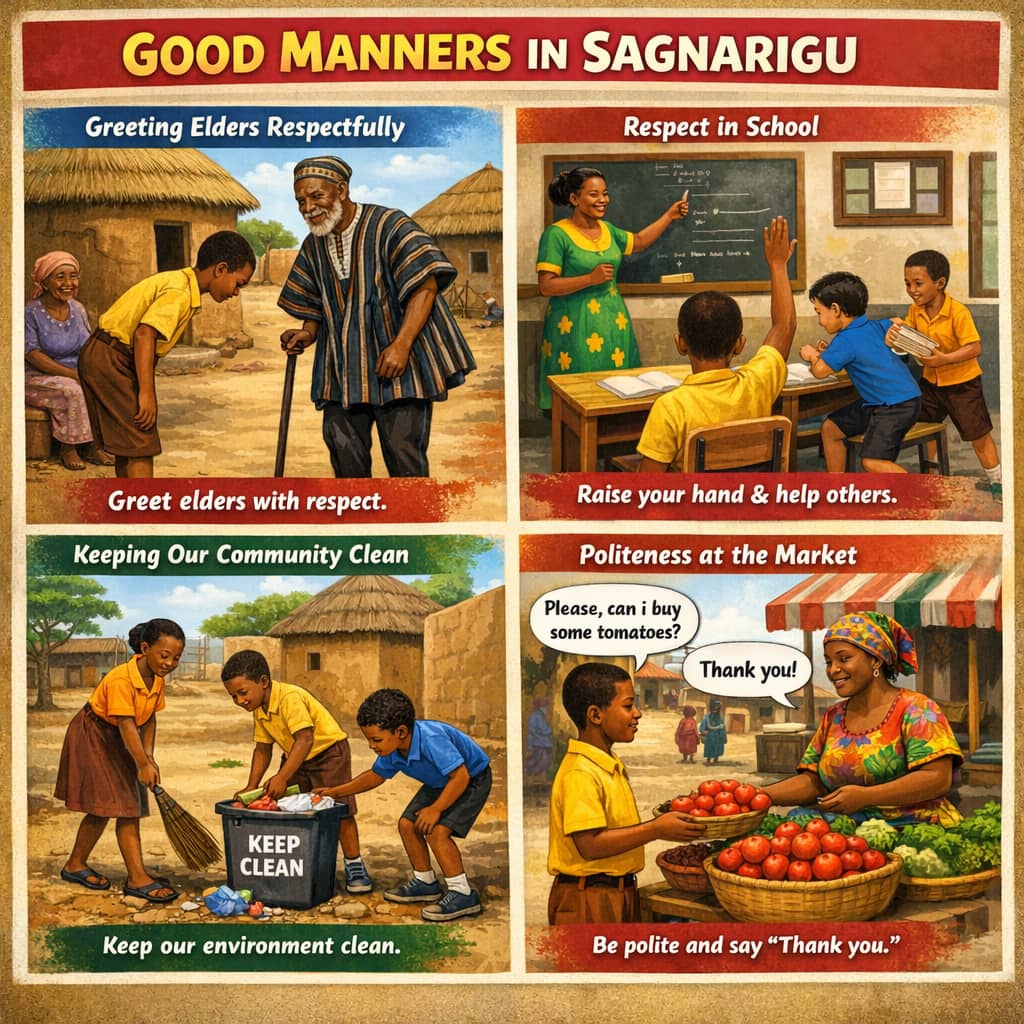


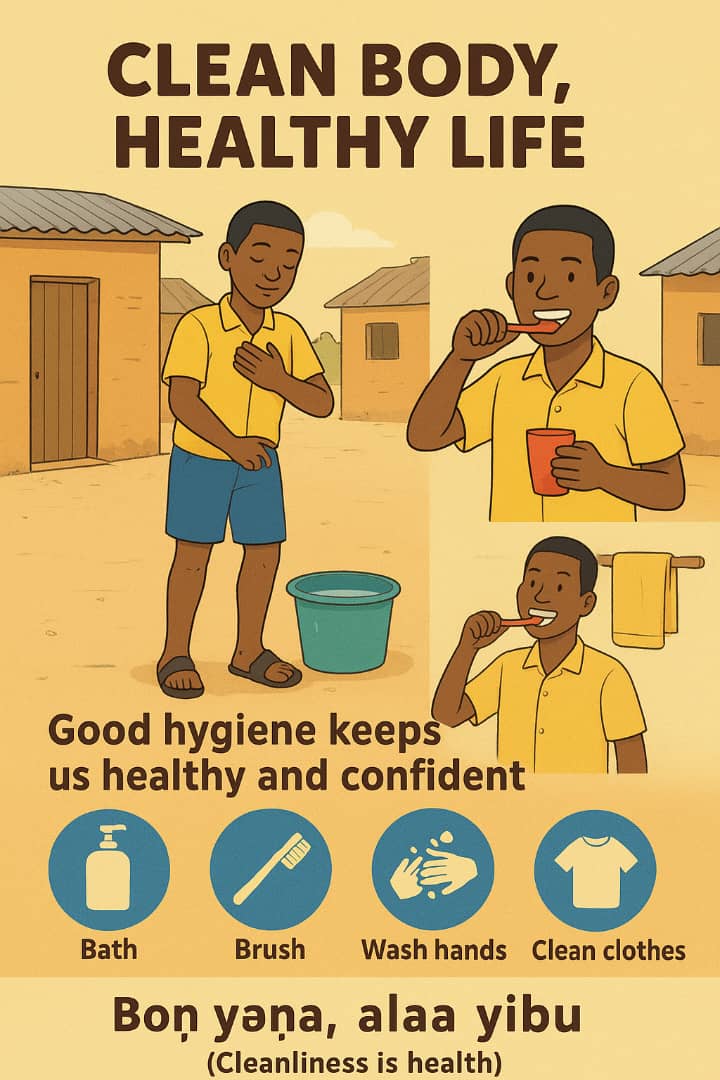

Supplement: Supplementary file 1 [file 1ca1014f2d839f6954fab3d3.docx]
